# Supplementary material for: Electrospun carbon nanofibers decorated with various amounts of electrochemically-inert nickel nanoparticles for use as high-performance energy storage materials
Source: Royal Society of Chemistry journal article supplement (doi:10.1039/c1ra00676b), 2011-10-31
Supplement: c1ra00676b.pdf [file c1ra00676b.pdf]

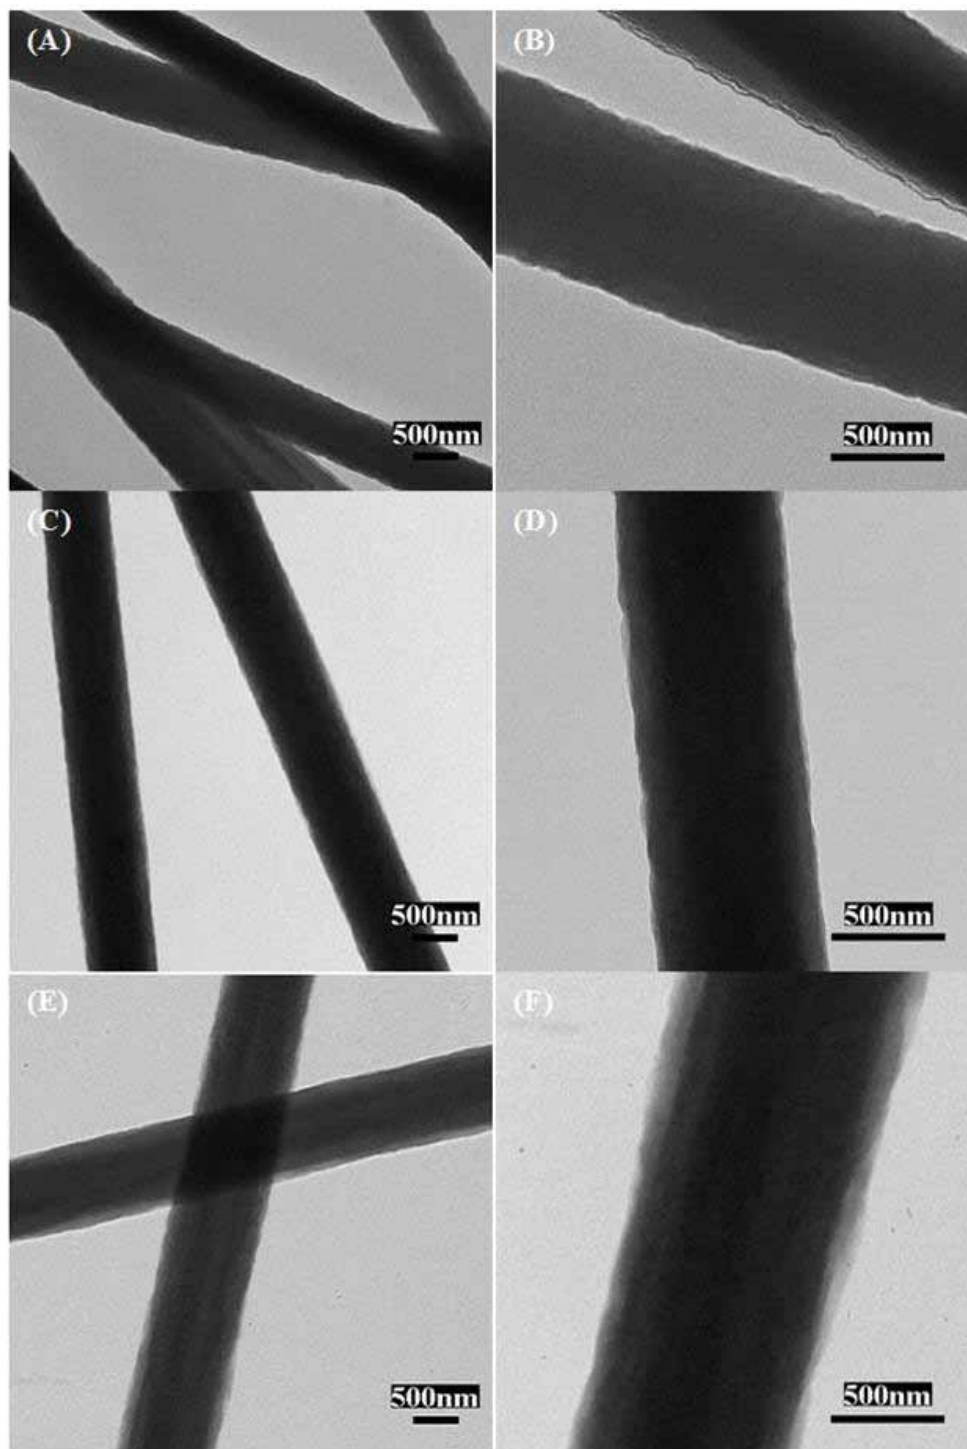

**Figure S1.** TEM images of Ni(OAc)<sub>2</sub>·4H<sub>2</sub>O/PAN composite nanofibers with different Ni(OAc)<sub>2</sub>·4H<sub>2</sub>O concentrations: (A, B) 15, (C, D) 30, and (E, F) 50 wt %.



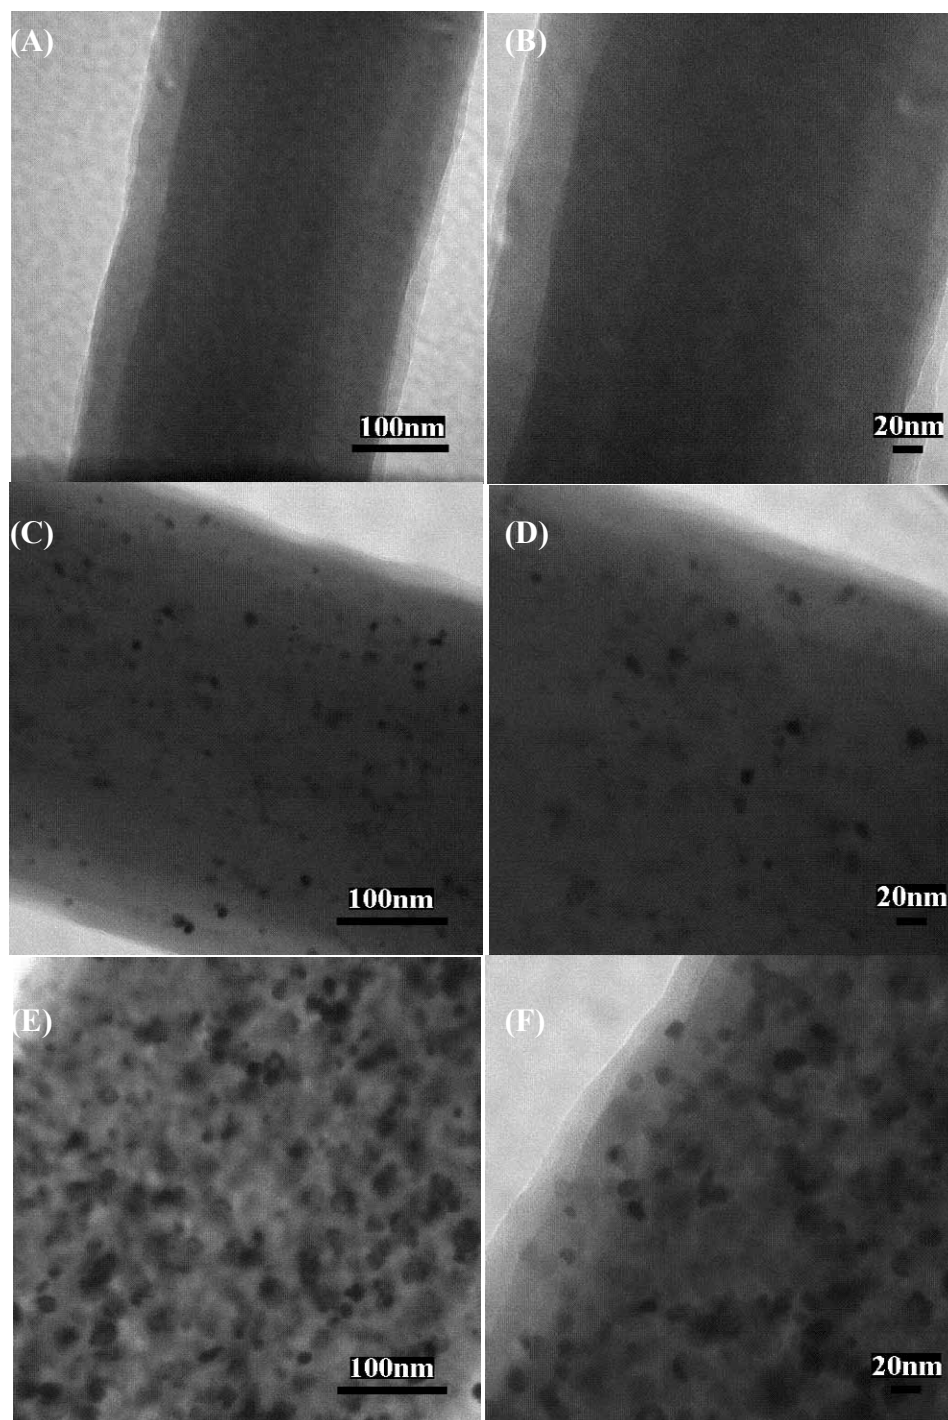

**Figure S2.** TEM images of Ni/C composite nanofibers with different Ni contents: (A, B) 5, (C, D) 12, and (E, F) 16 wt %.

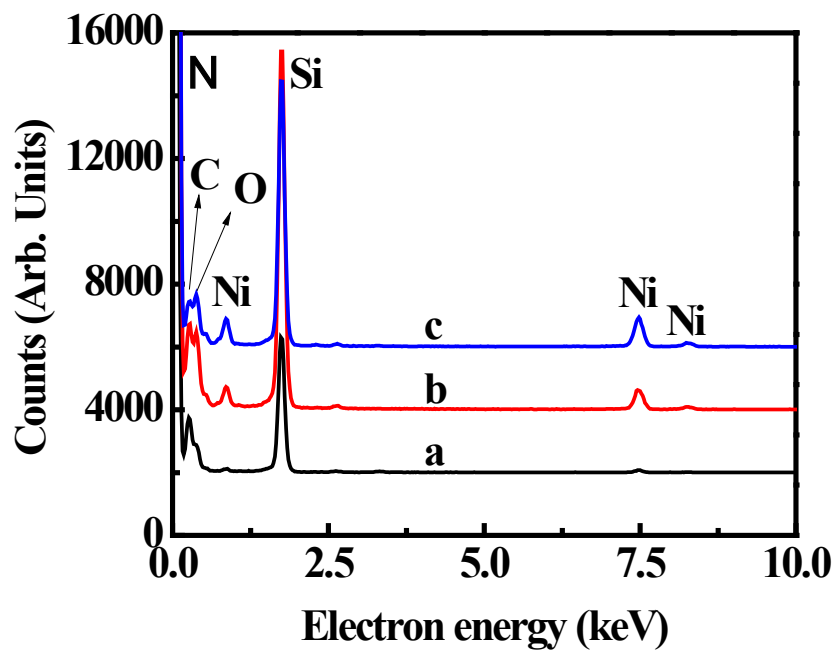

**Figure S3.** Energy-dispersive X-ray (EDX) spectrum of Ni/C composite nanofibers with different Ni contents: (a) 5, (b) 12, and (c) 16 wt %.
